# Supplementary material for: Topographic Relationship between Telangiectasia and Cone Mosaic Disruption in Macular Telangiectasia Type 2
Source: MDPI journal article supplement (doi:10.3390/jcm9103149), 2020-09-29
Supplement: s1 [file s1]

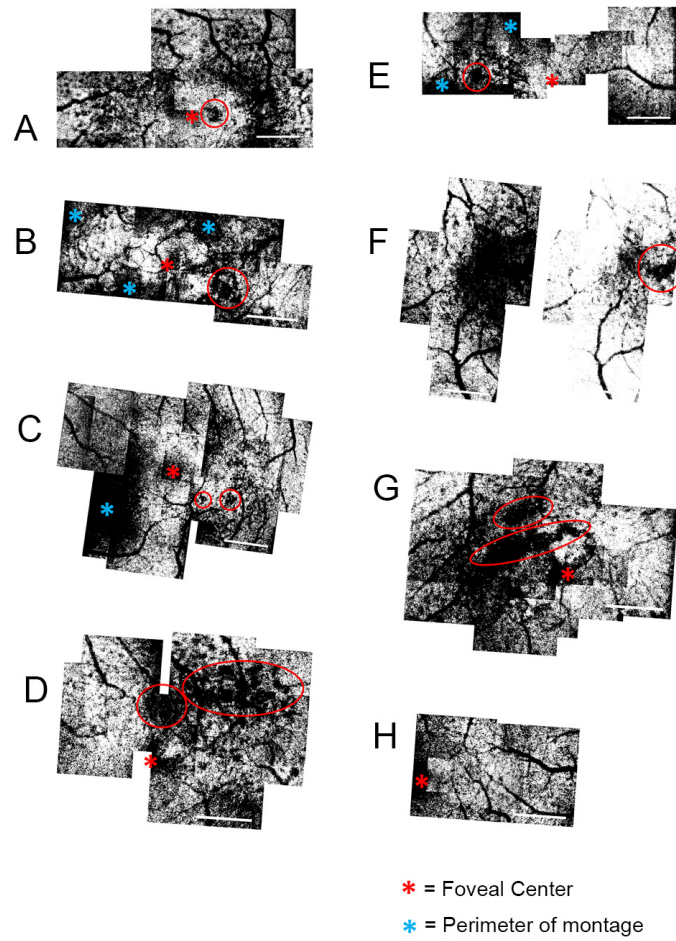

**Figure S1.** Identification and exclusion of adaptive optics scanning laser ophthalmoscopy (AOSLO) lesions. Subjects 1-8 (A-H). Lesions (red circle) included discrete hypo-reflective areas of at least 100  $\mu\text{m}$  abutting hyper-reflective areas. The foveal center, montage perimeters, and vessel artifacts were excluded. Scale bars = 500  $\mu\text{m}$ .
